# Supplementary material for: Visible and near-infrared electrochromic thiophene–diketopyrrolopyrrole polymers
Source: Royal Society of Chemistry journal article supplement (doi:10.1039/c7ra01828b), 2017-01-01
Supplement: c7ra01828b1.pdf [file c7ra01828b1.pdf]

## Supporting information

### Visible and Near-Infrared Electrochromic Thiophene- Diketopyrrolopyrrole Polymers

Xiuhong Chen<sup>1,2</sup>, Wenqiang Qiao<sup>1\*</sup>, Zhi Yuan Wang<sup>1,3\*</sup>

<sup>1</sup>State Key Laboratory of Polymer Physics and Chemistry, Changchun Institute of Applied Chemistry, Chinese Academy of Sciences, Changchun 130022, P. R. China

<sup>2</sup>University of Chinese Academy of Sciences, Beijing 100049, P. R. China

<sup>3</sup>Department of Chemistry, Carleton University, 1125 Colonel By Drive, Ottawa, Ontario, Canada K1S 5B6

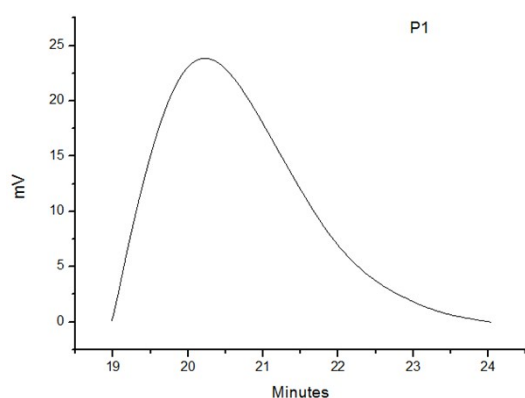

| Peak No | Mp    | Mn    | Mw    | Mz    | Mz+1  | Mv    | PDI     |
|---------|-------|-------|-------|-------|-------|-------|---------|
| P1      | 45154 | 18684 | 41225 | 63531 | 80598 | 37584 | 2.20643 |

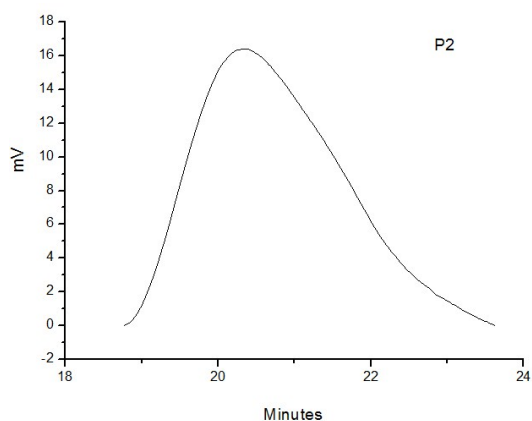

| Peak No | Mp    | Mn    | Mw    | Mz    | Mz+1  | Mv    | PDI      |
|---------|-------|-------|-------|-------|-------|-------|----------|
| P2      | 40926 | 17574 | 37853 | 61094 | 80911 | 34283 | 2.153923 |

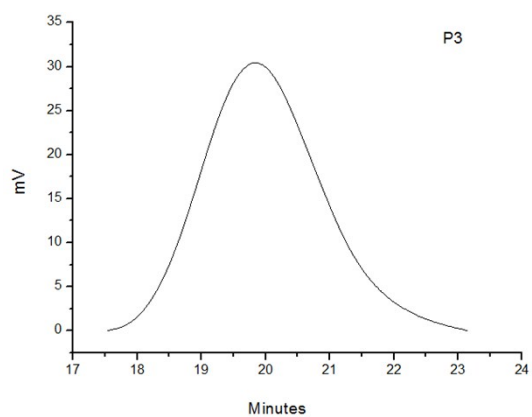

| Peak No | Mp     | Mn    | Mw     | Mz     | Mz+1   | Mv     | PDI     |
|---------|--------|-------|--------|--------|--------|--------|---------|
| P3      | 128869 | 50674 | 112333 | 183819 | 248925 | 101509 | 2.21678 |

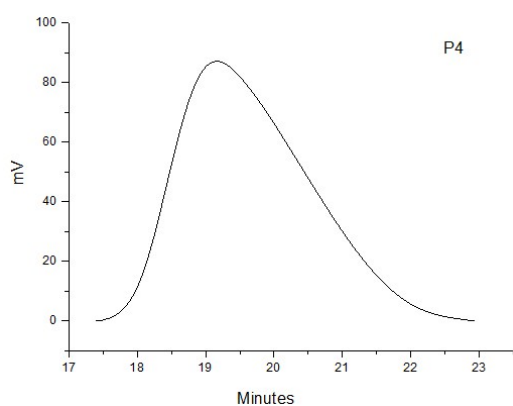

| Peak No | Mp    | Mn    | Mw    | Mz     | Mz+1   | Mv    | PDI     |
|---------|-------|-------|-------|--------|--------|-------|---------|
| P4      | 66910 | 37135 | 80467 | 141400 | 210680 | 72288 | 2.16688 |

**Figure S1.** The GPC traces of polymers **P1-P4**

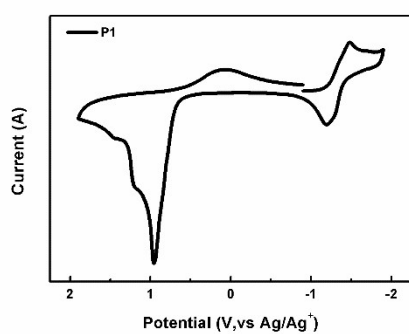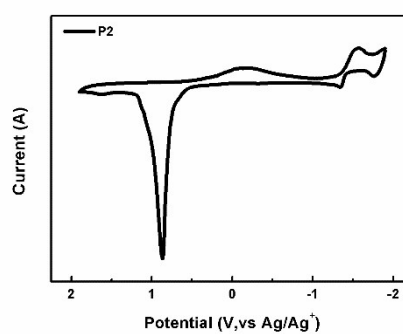

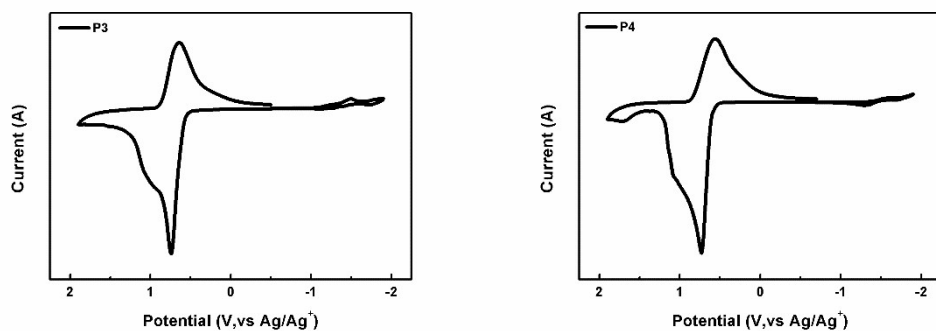

**Figure S2.** Cyclic voltammograms of polymers **P1-P4** films on Platinum disk electrode in 0.1 M n-Bu<sub>4</sub>NPF<sub>6</sub> solution in dry acetonitrile with a scan rate of 50mV/s.

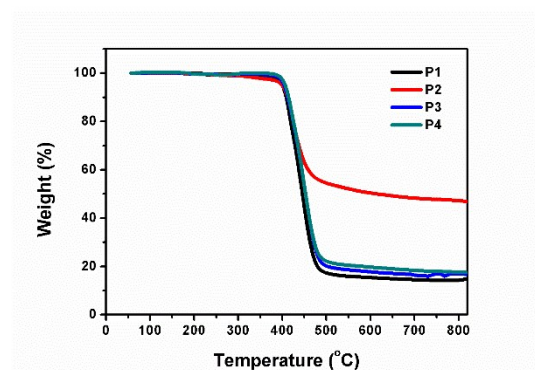

**Figure S3.** TGA traces of polymers **P1-P4**.

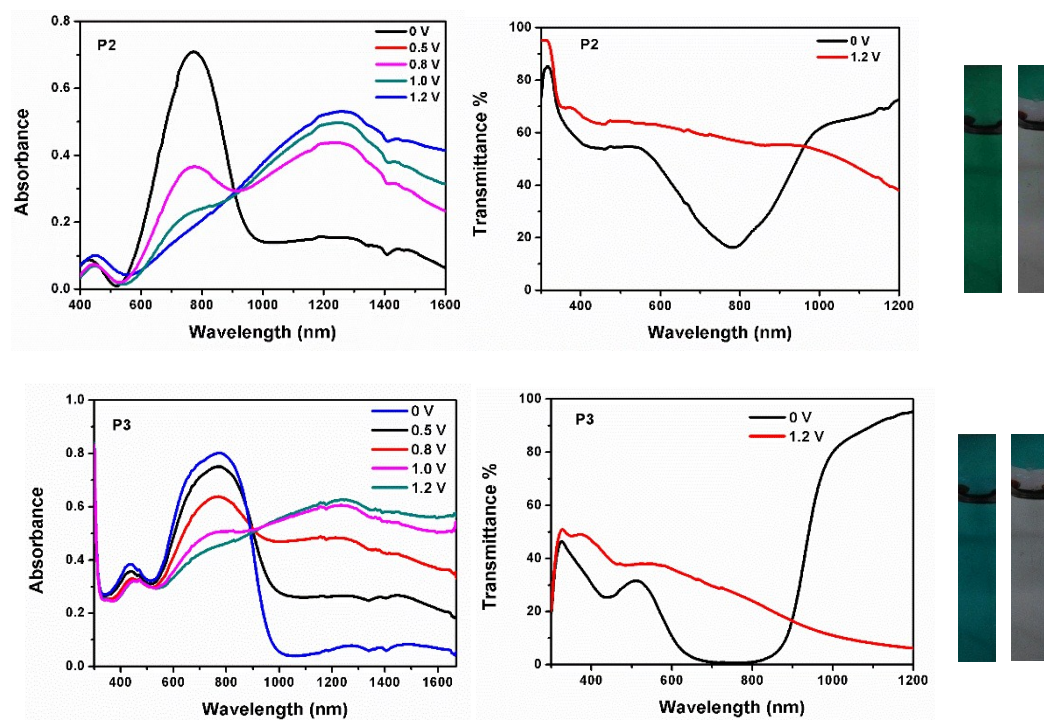

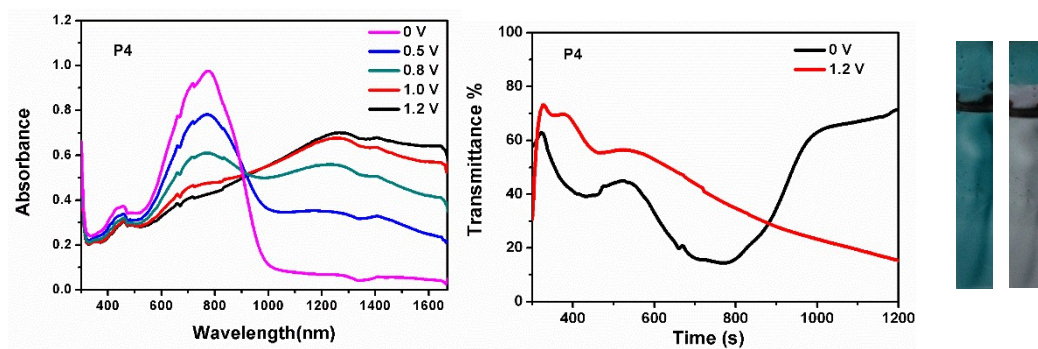

**Figure S4.** The spectroelectrochemistry, transmittance spectra and the photographs of **P2**, **P3** and **P4** at the neutral state (left, under 0 V) and oxidation state (right, under 1.2 V) under the applied potentials.

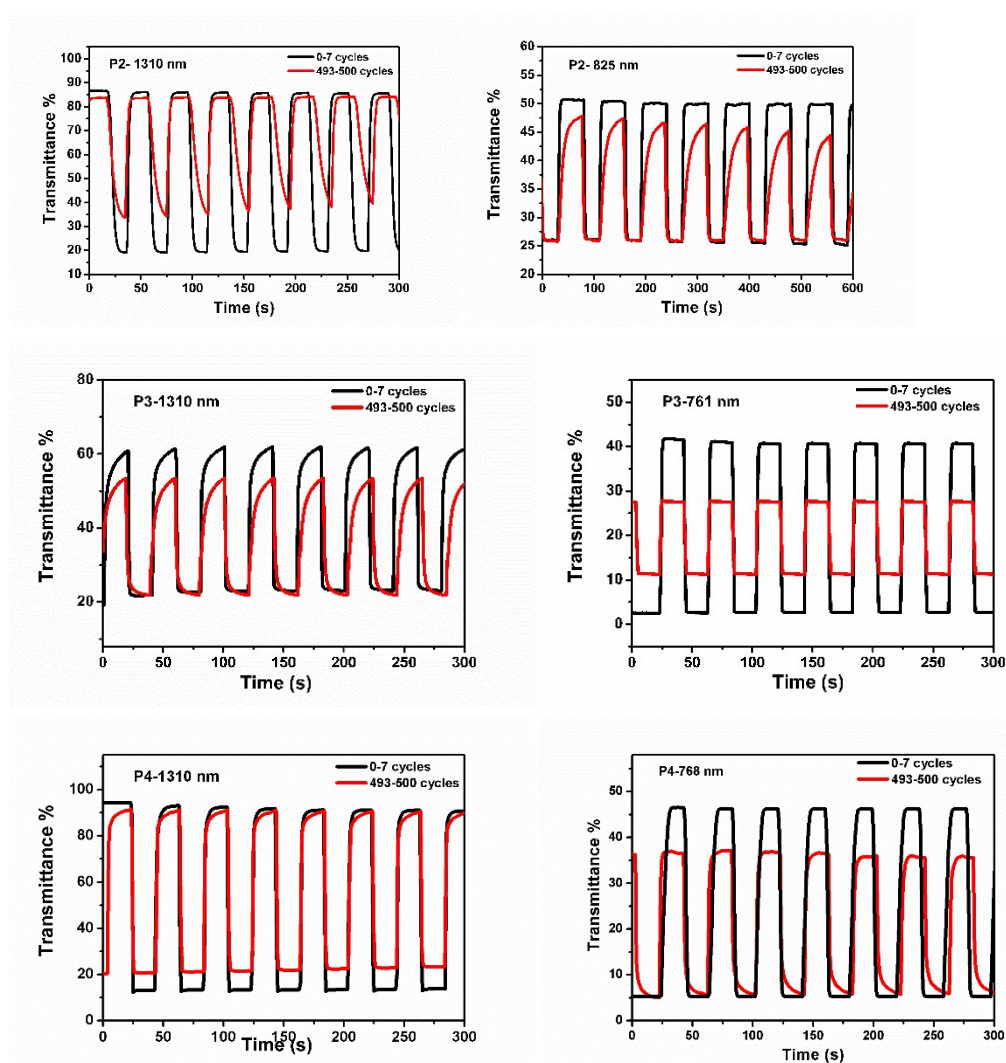

**Figure S5.** Chronoamperometric spectra of polymers at a given wavelength.
